# Supplementary material
Source: MDPI journal article supplement (https://www.mdpi.com/2073-4352/8/10/378)
Supplement: s1 [file s1]

## Supplementary Material (two pages) to

### "NMR Crystallography of the Polymorphs of Metergoline"

by Czernek, Urbanová and Brus (*Crystals* 2018):

Results of the analysis of the HETCOR spectrum described in the main text; in Table 1 below, atoms are numbered as in the XRD structure [reference 1];

$\delta$  is the experimental chemical shift as actually used;

$\sigma$  is the GIPAW-RPBE chemical shielding as parsed from the CASTEP output;

$\varepsilon$  is the theoretical chemical shift (in an ideal case,  $\varepsilon$  and  $\delta$  would be the same for a given nucleus) [references 2, 3] approximated by entering a  $\sigma$  value into the corresponding model:

$$\varepsilon(\text{C}) = -0.978947 \cdot \sigma(\text{C}) + 169.5016 \text{ ppm}; \quad \varepsilon(\text{H}) = -1.01795 \cdot \sigma(\text{H}) + 31.5801 \text{ ppm};$$

the quantification of an level of agreement between theoretical and measured 2D spectra (which are expressed in terms of [ $\varepsilon(\text{C})$ ;  $\varepsilon(\text{H})$ ] and [ $\delta(\text{C})$ ;  $\delta(\text{H})$ ] pairs, respectively) leads to the following values of key statistical parameters [references 2, 3]:

$$s_{\text{C}} = 1.26 \text{ ppm}; \quad s_{\text{H}} = 0.471 \text{ ppm}; \quad s_{\text{CH}} = 0.125 (\text{ppm})^2$$

## References

1. Hušák, M.; Jegorov, A.; Brus, J.; van Beek, W.; Pattison, P.; Christensen, M.; Favre-Nicolin, V.; Maixner, J. **2008**, *19*, 517.
2. Czernek, J.; Brus, J. *Chem. Phys. Lett.* **2014**, *586*, 56.
3. Czernek, J.; Brus, J. *Chem. Phys. Lett.* **2014**, *608*, 334.

Table 1

| resolved<br>$^{13}\text{C} - ^1\text{H}$<br>pair # | C in CIF | $\delta^{13}\text{C}$<br>(ppm) | $\sigma^{13}\text{C}$<br>(ppm) | $\epsilon^{13}\text{C}$<br>(ppm) | H in CIF             | $\delta^1\text{H}$<br>(ppm) | $\sigma^1\text{H}$<br>(ppm) | $\epsilon^1\text{H}$<br>(ppm) |
|----------------------------------------------------|----------|--------------------------------|--------------------------------|----------------------------------|----------------------|-----------------------------|-----------------------------|-------------------------------|
| 1                                                  | C101     | 121.41                         | 51.8772                        | 118.7166                         | H1011                | 6.09                        | 24.5009                     | 6.6393                        |
| 2                                                  | C103     | 24.64                          | 148.6116                       | 24.0187                          | H1031                | 2.25                        | 28.2562                     | 2.8166                        |
| 3                                                  | ditto    | ditto                          | ditto                          | ditto                            | H1032                | 0.31                        | 30.5250                     | 0.5071                        |
| 4                                                  | C104     | 67.23                          | 106.1006                       | 65.6348                          | H1041                | 1.87                        | 28.9373                     | 2.1233                        |
| 5                                                  | C105     | 63.20                          | 108.3439                       | 63.4387                          | H1051                | 1.64                        | 29.0951                     | 1.9626                        |
| 6                                                  | ditto    | ditto                          | ditto                          | ditto                            | H1052                | 2.57                        | 27.7577                     | 3.3240                        |
| 7                                                  | C106     | 37.73                          | 134.5571                       | 37.7774                          | H1061                | 2.24                        | 28.9386                     | 2.1219                        |
| 8                                                  | C107     | 34.14                          | 139.4236                       | 33.0133                          | H1071                | 1.17                        | 29.8190                     | 1.2257                        |
| 9                                                  | ditto    | ditto                          | ditto                          | ditto                            | H1072                | 3.28                        | 28.1017                     | 2.9739                        |
| 10                                                 | C108     | 38.92                          | 133.2320                       | 39.0746                          | H1081                | 1.21                        | 30.0440                     | 0.9967                        |
| 11                                                 | C110     | 112.18                         | 59.3606                        | 111.3907                         | H1101                | 7.22                        | 24.4351                     | 6.7063                        |
| 12                                                 | C111     | 119.98                         | 50.2540                        | 120.3056                         | H1111                | 6.77                        | 24.9321                     | 6.2004                        |
| 13                                                 | C112     | 105.70                         | 66.7012                        | 104.2047                         | H1121                | 3.64                        | 26.1867                     | 4.9232                        |
| 14                                                 | C117     | 46.27                          | 125.5884                       | 46.5572                          | H1171                | 3.75                        | 27.7005                     | 3.3823                        |
| 15                                                 | ditto    | ditto                          | ditto                          | ditto                            | H1172                | ditto                       | 26.8250                     | 4.2735                        |
| 16                                                 | C115     | 32.08                          | 140.7491                       | 31.7157                          | averaged:<br>H1151–3 | 2.50                        | 28.3791                     | 2.6915                        |
| 17                                                 | C116     | 43.48                          | 128.8369                       | 43.3771                          | averaged:<br>H1161–3 | 2.57                        | 28.4928                     | 2.5757                        |
| 18                                                 | C119     | 67.35                          | 100.9125                       | 70.7136                          | H1191                | 6.04                        | 24.9636                     | 6.1683                        |
| 19                                                 | ditto    | ditto                          | ditto                          | ditto                            | H1192                | 4.69                        | 26.2504                     | 4.8584                        |
| 20                                                 | C123     | 126.32                         | 42.5093                        | 127.8873                         | H1231                | 7.41                        | 23.6617                     | 7.4936                        |
| 21                                                 | C201     | 121.22                         | 51.2631                        | 119.3178                         | H2011                | 6.52                        | 24.0662                     | 7.0818                        |
| 22                                                 | C203     | 24.75                          | 147.2782                       | 25.3241                          | H2031                | 0.22                        | 30.9611                     | 0.0631                        |
| 23                                                 | ditto    | ditto                          | ditto                          | ditto                            | H2032                | 3.12                        | 29.0271                     | 2.0318                        |
| 24                                                 | C204     | 66.57                          | 104.8818                       | 66.8279                          | H2041                | 2.07                        | 29.1581                     | 1.8985                        |
| 25                                                 | C205     | 62.28                          | 110.2163                       | 61.6057                          | H2051                | 2.57                        | 28.6031                     | 2.4635                        |
| 26                                                 | ditto    | ditto                          | 110.2163                       | 61.6057                          | H2052                | 1.99                        | 28.9585                     | 2.1017                        |
| 27                                                 | C206     | 35.25                          | 136.9671                       | 35.4181                          | H2061                | 3.05                        | 28.3934                     | 2.6769                        |
| 28                                                 | C207     | 31.19                          | 142.9404                       | 29.5705                          | H2071                | 2.70                        | 28.6342                     | 2.4318                        |
| 29                                                 | ditto    | ditto                          | ditto                          | ditto                            | H2072                | 2.13                        | 29.0801                     | 1.9779                        |
| 30                                                 | C208     | 39.44                          | 132.8446                       | 39.4538                          | H2081                | 2.93                        | 28.4761                     | 2.5927                        |
| 31                                                 | C210     | 121.22                         | 59.0362                        | 111.7083                         | H2101                | 6.52                        | 24.8680                     | 6.2656                        |
| 32                                                 | C211     | 119.98                         | 49.6622                        | 120.8850                         | H2111                | 6.54                        | 25.4018                     | 5.7222                        |
| 33                                                 | C212     | 105.26                         | 65.5099                        | 105.3709                         | H2121                | 5.46                        | 25.0529                     | 6.0774                        |
| 34                                                 | C217     | 46.45                          | 125.3728                       | 46.7683                          | H2171                | 2.99                        | 27.6303                     | 3.4537                        |
| 35                                                 | ditto    | ditto                          | ditto                          | ditto                            | H2172                | ditto                       | 27.6346                     | 3.4493                        |
| 36                                                 | C215     | 34.25                          | 138.0452                       | 34.3627                          | averaged:<br>H2151–3 | 4.43                        | 26.9396                     | 4.1568                        |
| 37                                                 | C216     | 44.27                          | 126.6297                       | 45.5379                          | averaged:<br>H2161–3 | 1.98                        | 28.9853                     | 2.0744                        |
| 38                                                 | C219     | 68.21                          | 101.7565                       | 69.8874                          | H2191                | 4.87                        | 26.5025                     | 4.6018                        |
| 39                                                 | ditto    | ditto                          | ditto                          | ditto                            | H2192                | 5.25                        | 25.9588                     | 5.1552                        |
| 40                                                 | C223     | 130.04                         | 40.0567                        | 130.2882                         | H2231                | 7.97                        | 23.7541                     | 7.3995                        |
